# Supplementary material for: Exosomes from uterine fluid promote capacitation of human sperm
Source: PeerJ. 2024 Apr 25;12:e16875. doi: 10.7717/peerj.16875 (PMC11056104; doi:10.7717/peerj.16875)
Supplement: Supplemental Information 1 [file peerj-12-16875-s001.xlsx]

## Sheet: Sheet1
Motility of sperm(the percentage of forward)
1,2，3 represent different donors
A,B,C repersent that one donor’s sperm were repeated three times.
	Blank%（2h）	EVs%(2h)			Blank%(4h)	EVs%(4h)
1	49	49.7		1	47.8	54.9
2	52.7	54.9		2	49.4	56.8
3	53.2	51.7		3	50.7	54.4
AVERAGE	51.63	52.1			49.3	55.37
SEM	1.32	1.51			0.84	0.73
	Blank（2h）	EVs(2h)			Blank(4h)	EVs(4h)
1A	48.1	49.8		1A	47.2	55.9
1B	49.2	50.6		1B	48.5	55.2
1C	49.7	48.7		1C	47.7	53.6
2A	53.2	53.9		2A	50.5	56.3
2B	51.3	55.3		2B	48.1	56.5
2C	53.6	55.5		2C	49.6	57.6
3A	54.4	51.8		3A	52.3	54.3
3B	53.6	53.5		3B	50.6	56.8
3C	51.6	49.8		3C	49.2	52.1
