# Supplementary material for: Exosomes from uterine fluid promote capacitation of human sperm
Source: PeerJ. 2024 Apr 25;12:e16875. doi: 10.7717/peerj.16875 (PMC11056104; doi:10.7717/peerj.16875)
Supplement: Supplemental Information 2 [file peerj-12-16875-s002.xlsx]

## Sheet: Sheet1
ROS in sperm was measured by flow cytometry.
1,2，3 represent different donors
A,B,C repersent that one donor’s sperm were repeated three times.
	A(Blank)	B(EVs)	C(A23817)
1	57.6	69.9	73.7
2	57.5	71.4	75.1
3	57.2	68.5	72.3
AVERAGE	57.43	69.93	73.7
SEM	0.12	0.84	0.8
1A	57.7	70.3	74.8
1B	57	69.2	72.4
1C	58.1	70.2	73.9
2A	57.5	72.1	76
2B	56.9	70.3	74.8
2C	58.1	71.8	74.5
3A	57.6	69.5	72.6
3B	56.6	68.1	72.5
3C	57.4	67.9	71.8
