# Supplementary material for: Exosomes from uterine fluid promote capacitation of human sperm
Source: PeerJ. 2024 Apr 25;12:e16875. doi: 10.7717/peerj.16875 (PMC11056104; doi:10.7717/peerj.16875)
Supplement: Supplemental Information 3 [file peerj-12-16875-s003.xlsx]

## Sheet: Sheet1
Percentage of acrosome reactions in each group.
1,2，3 represent different donors
A,B,C repersent that one donor’s sperm were repeated three times.
	A(Blank)	B(EVs)	C(A23817)
1	1.38	28.88	37.66
2	2.11	23.26	39.86
3	1.53	31.12	41.66
AVERAGE	1.67	27.75	39.73
SEM	0.39	4.05	2
1A	1.06	31.06	37.56
1B	1.45	27.63	38.2
1C	1.63	27.95	37.22
2A	2.45	25.46	42.21
2B	1.96	21.98	40.98
2C	1.92	22.34	41.79
3A	1.32	30.07	40.02
3B	1.75	32.5	39.5
3C	1.52	30.79	39.67
